# Supplementary material for: Topography-induced large-scale antiparallel collective migration in vascular endothelium
Source: PubMed Central journal article supplement (PMC9120158; doi:10.1038/s41467-022-30488-0), 2022-05-19
Supplement: 41467_2022_30488_MOESM3_ESM.pdf [file 41467_2022_30488_MOESM3_ESM.pdf]

## **Description of Additional Supplementary Files**

File Name: Supplementary Movie 1

Description: 24 h live imaging of HUVEC monolayers with nucleus stained with Hoechst on flat (left) or microgroove (right) substrate.

File Name: Supplementary Movie 2

Description: Averaged x-velocity fields over 24 h of HUVEC monolayers on flat (left) or microgroove (right) substrate.

File Name: Supplementary Movie 3

Description: Averaged x-velocity fields over 24 h of low-density (left), medium-density (center), or high-density (right) HUVEC monolayers.

File Name: Supplementary Movie 4

Description: Example of an individual cell on microgrooves with nucleus stained with Hoechst showing polarity reversals.
